# Supplementary figures and images for: Pre-clinical study of iron oxide nanoparticles fortified artesunate for efficient targeting of malarial parasite
Source: PubMed Central journal article supplement — eBioMedicine. 2019 Jun 27;45:261–77. doi: 10.1016/j.ebiom.2019.06.026 (PMC6642363; doi:10.1016/j.ebiom.2019.06.026), 2019-06-27

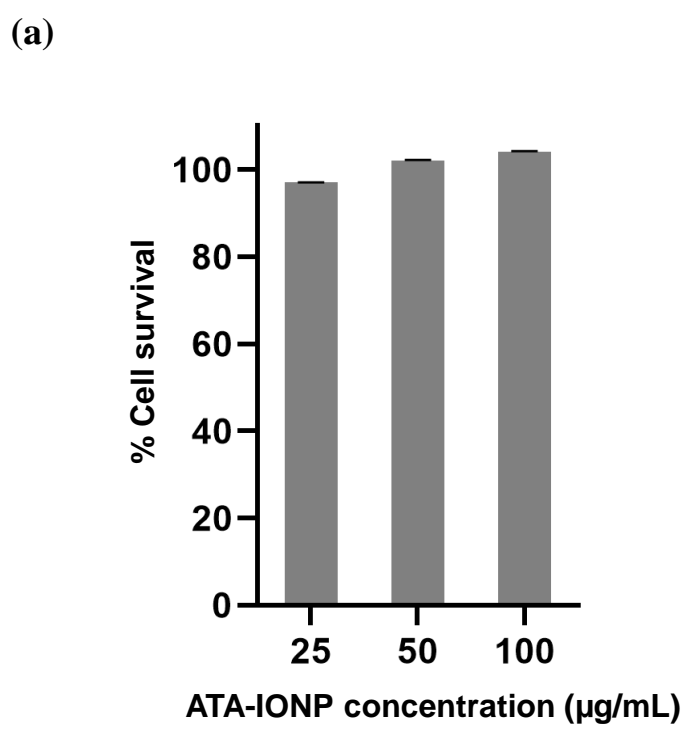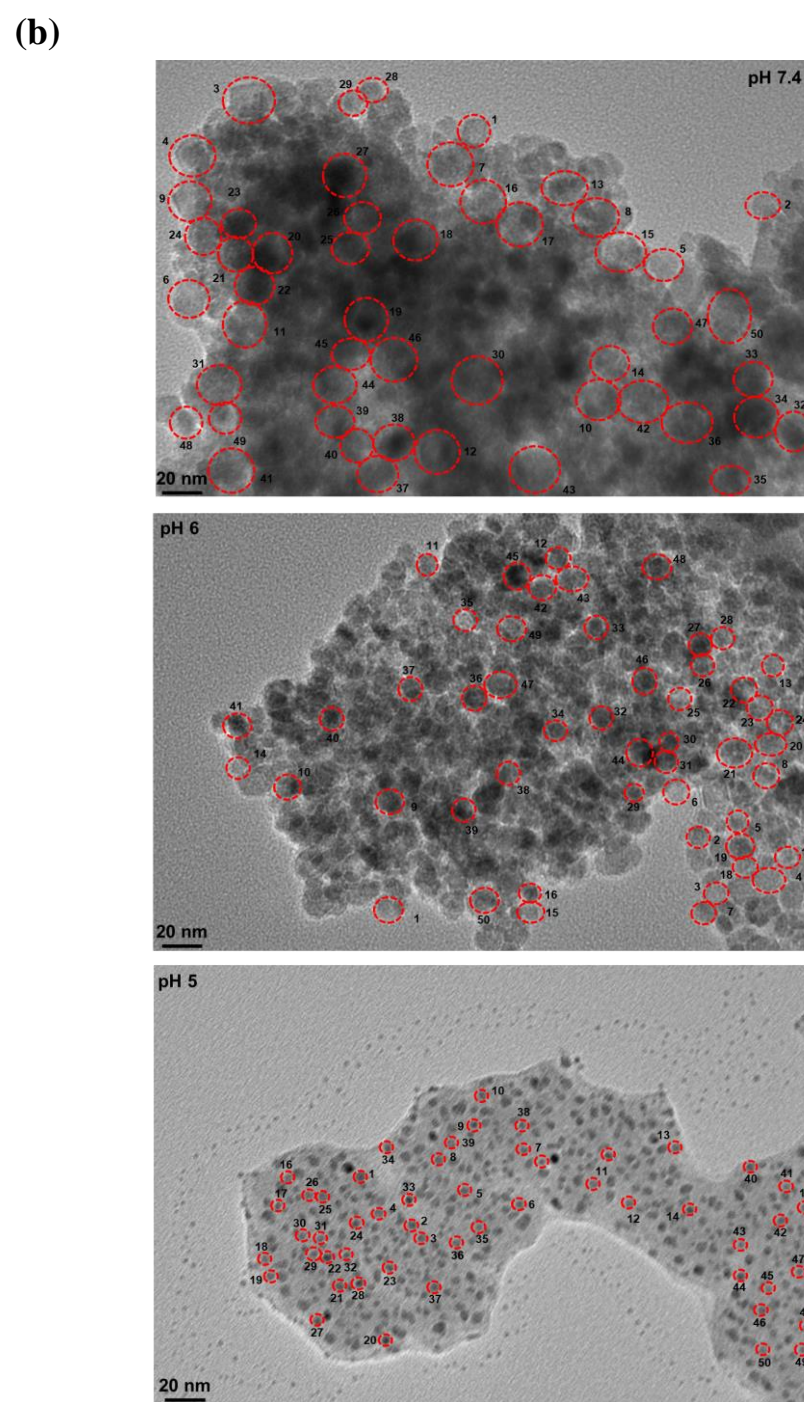

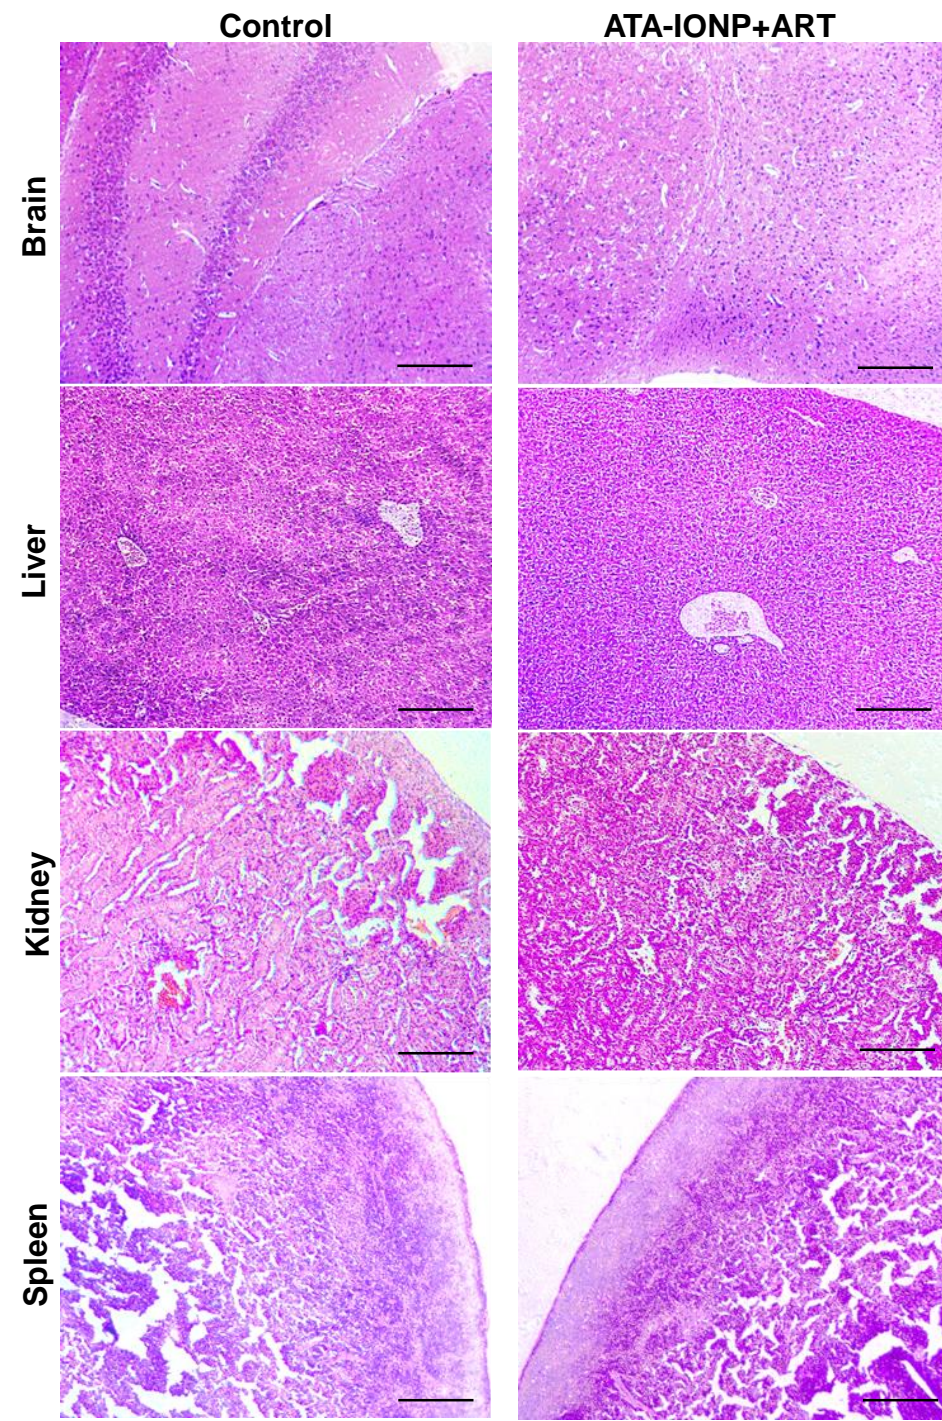

Supplement: mmc1.pdf [file mmc1.pdf]
